# Supplementary material for: Metal Ion-Induced Formation of Metallogels by Visible-Light-Responsive Phenylalanine-Functionalized Arylazopyrazole Ligands
Source: MDPI journal article supplement (doi:10.3390/photochem3040026), 2023-10-24
Supplement: s1 [file s1]

Supporting Materials:

# Metal Ion-Induced Metallogel formation by Visible-Light Responsive Phenylalanine-Functionalized Arylazopyrazole Ligands

Mikayla Browning, Alexandra Jefferson, Jazz Geter and Kesete Ghebreyessus Department of chemistry and biochemistry Hampton University, Hampton VA, 23668, USA email: Kesete.Ghebreyessus@hamptonu.edu; Tel: +1-757-727-5475

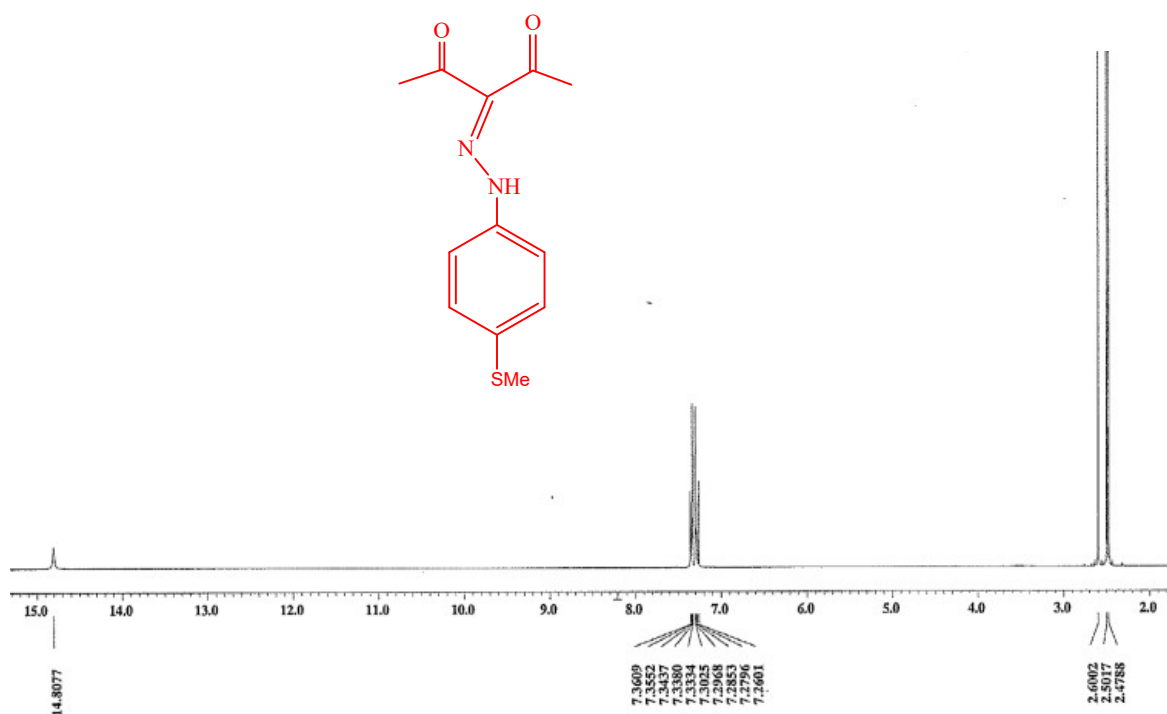

**Figure S1.** <sup>1</sup>H-NMR spectrum of 4-(methylthio)-3-(2-phenylhydrazono)pentane-2,4-dione (2a) in CDCl<sub>3</sub>.

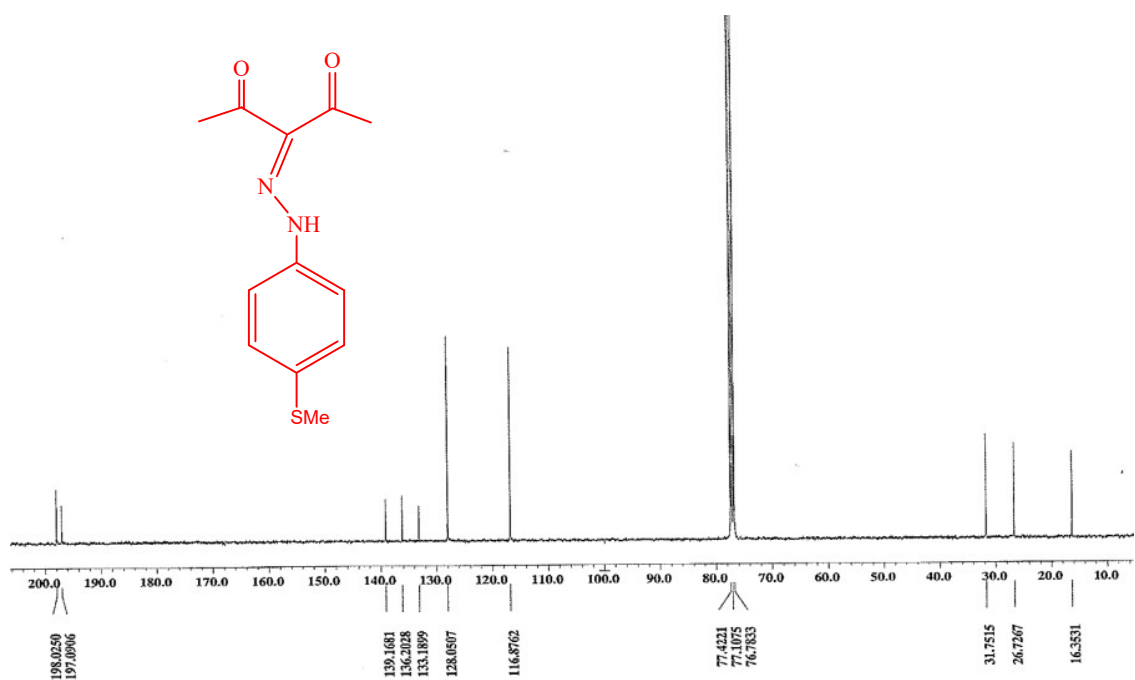

**Figure S2.** <sup>13</sup>C-NMR spectrum of 2-(methylthio)-3-(2-phenylhydrazono)pentane-2,4-dione (**2a**) in CDCl<sub>3</sub>.

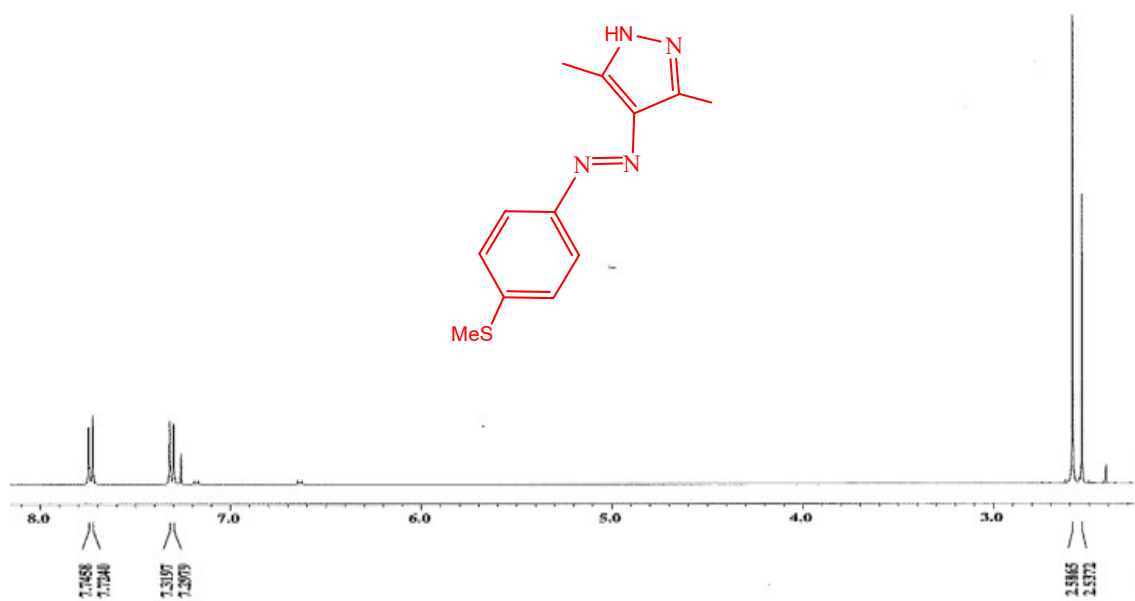

**Figure S3.** <sup>1</sup>H-NMR spectrum of 4-(Methylthio)-3,5-dimethyl-4-phenyldiazenyl-1H-pyrazole (**3a**) in CDCl<sub>3</sub>.

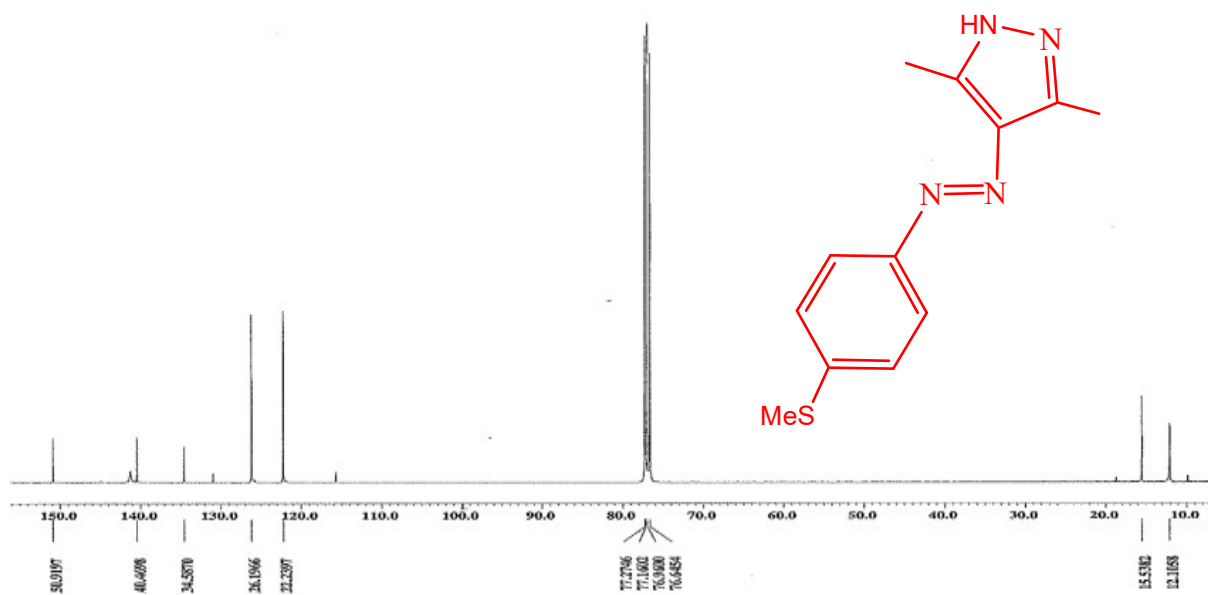

**Figure S4.** <sup>13</sup>C-NMR spectrum 4-(Methylthio)- 3,5-dimethyl-(4-phenyldiazenyl)-1H-pyrazole (3a) in CDCl<sub>3</sub>.

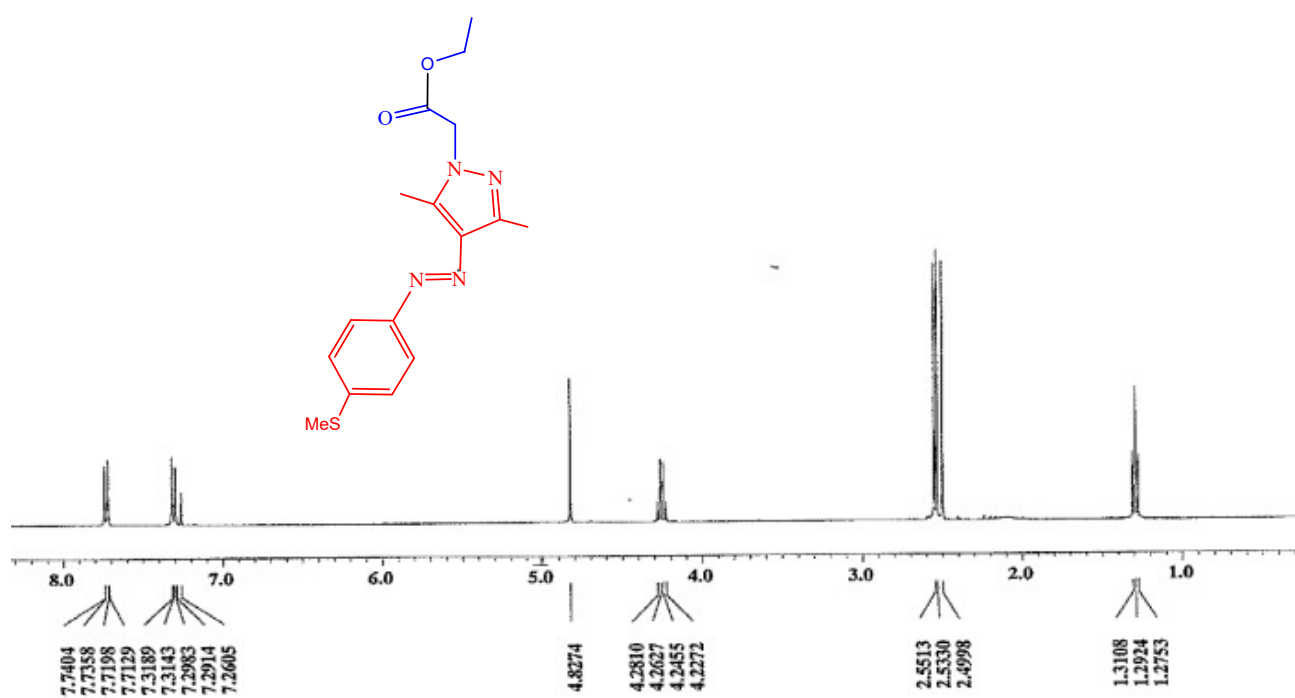

**Figure S5.** <sup>1</sup>H NMR spectra of 4-(Methylthio)-3,5-dimethyl-(4-phenyldiazenyl)-N-CH<sub>2</sub>CO<sub>2</sub>CH<sub>2</sub>CH<sub>3</sub> (4a) in CDCl<sub>3</sub>.

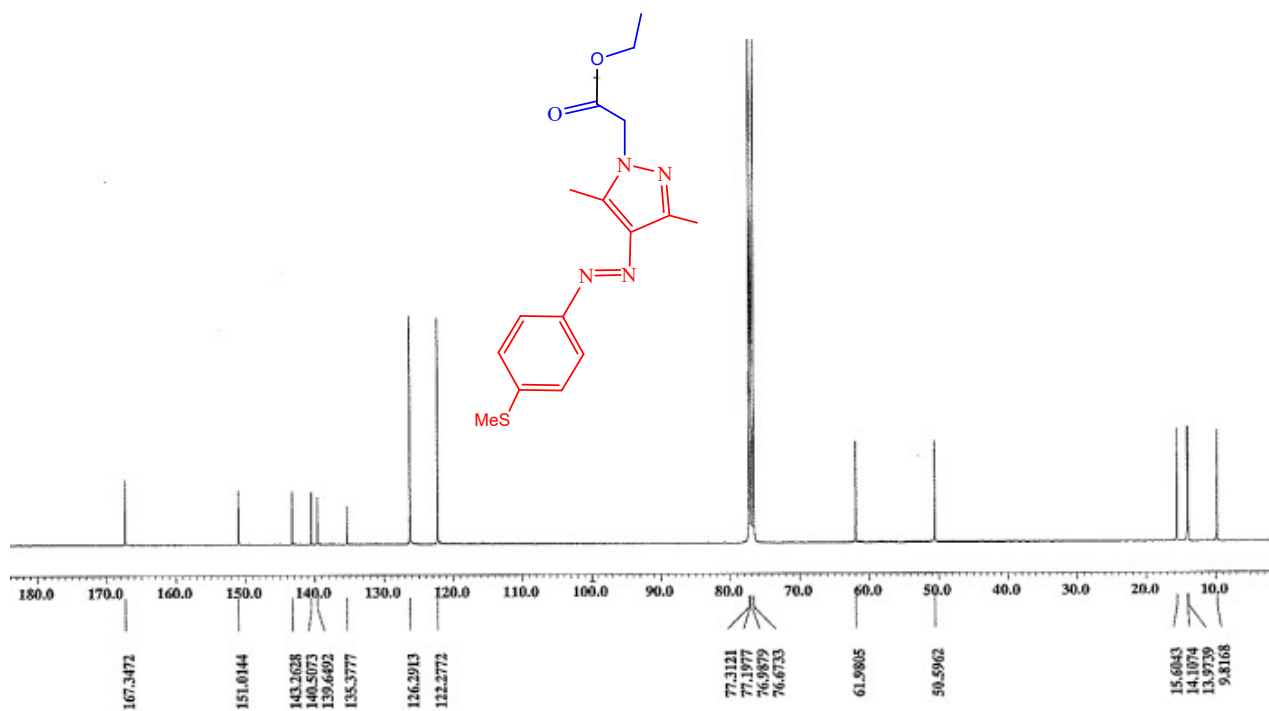

**Figure S6.** <sup>13</sup>C-NMR spectra of 4-(Methylthio)-3,5-dimethyl-(4-phenyldiazenyl)-N-CH<sub>2</sub>CO<sub>2</sub>CH<sub>2</sub>CH<sub>3</sub> (**4a**) in CDCl<sub>3</sub>.

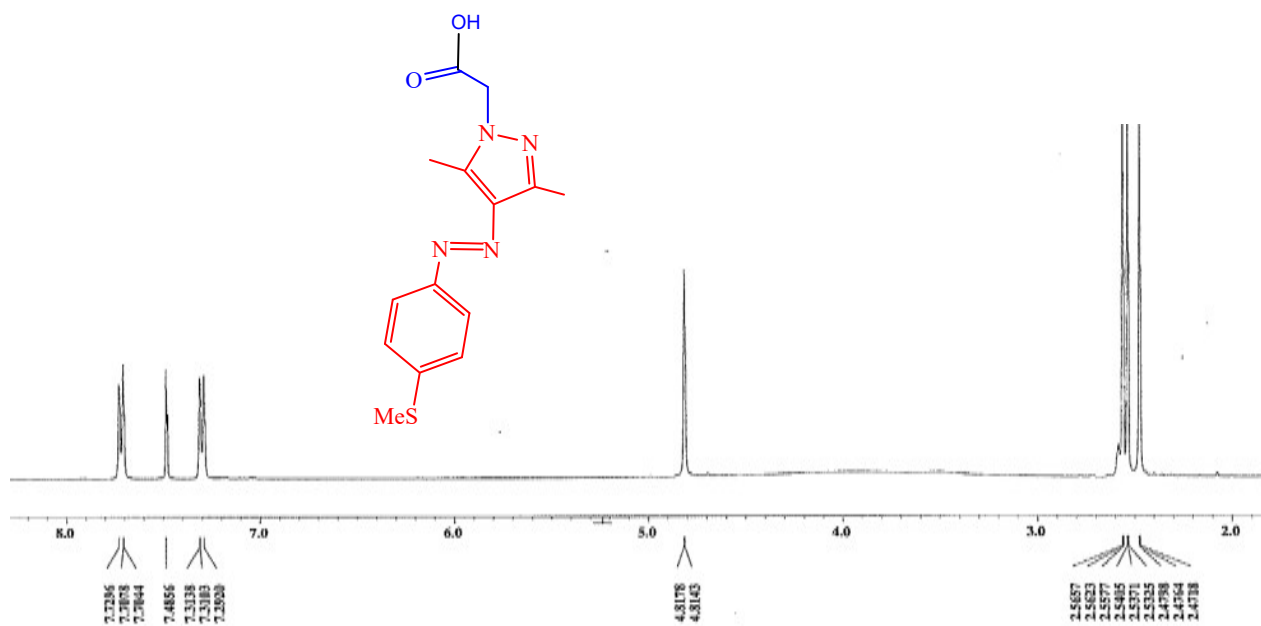

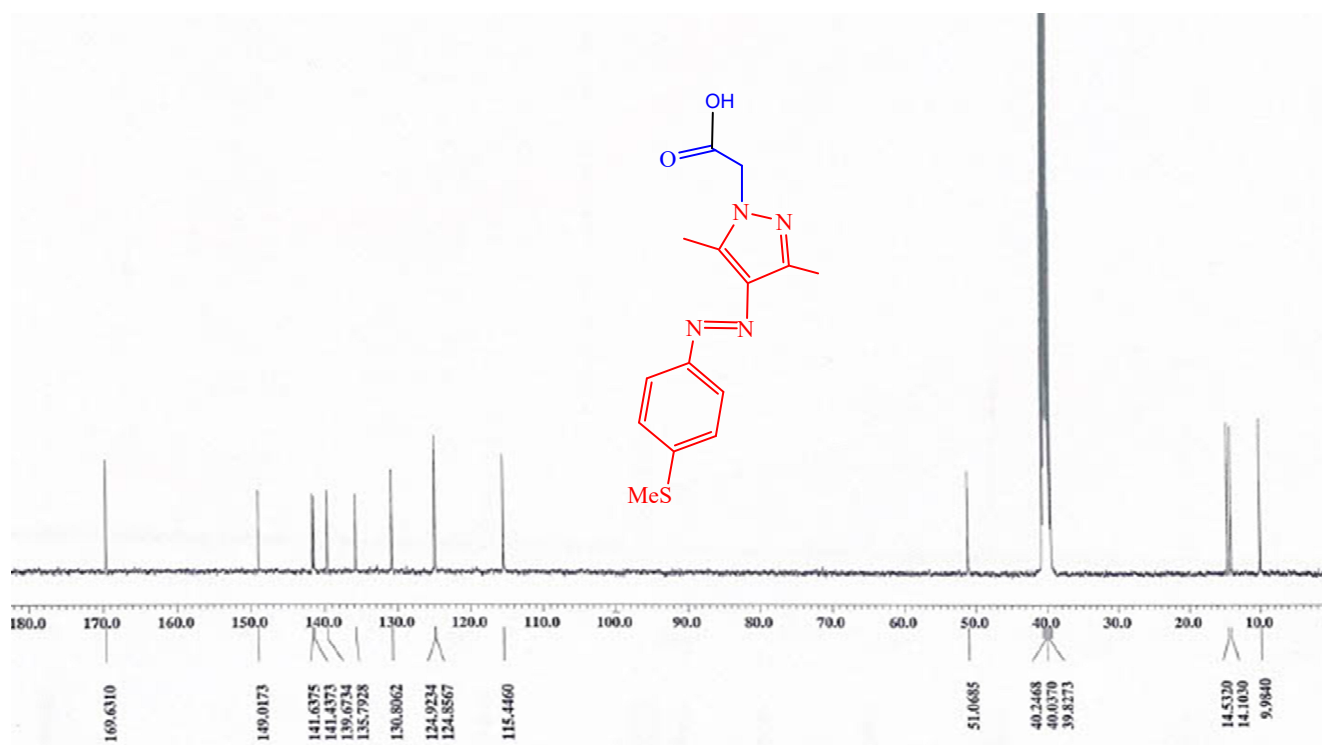

**Figure S7.** <sup>1</sup>H-NMR spectra for 4-(Methylthio)-3,5-dimethyl (4-phenyldiazenyl)-N-CH<sub>2</sub>CO<sub>2</sub>H (5a) in DMSO.

**Figure S8.** <sup>13</sup>C-NMR spectrum for 4-(Methylthio)-3,5-dimethyl (4-phenyldiazenyl)-N-CH<sub>2</sub>CO<sub>2</sub>H (5a) in DMSO.

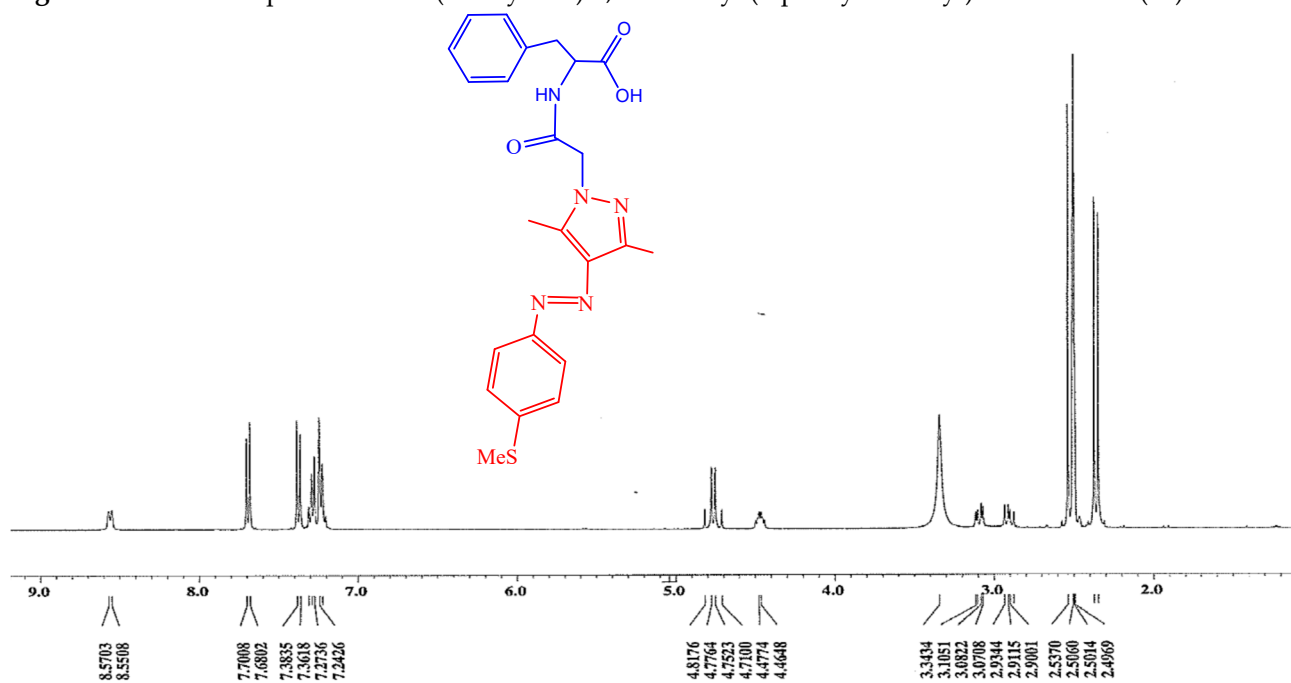

**Figure S9.**  $^1\text{H}$ -NMR spectrum 4-(Methylthio)- 3,5-dimethyl-(4-phenyldiazenyl)-N-methylene-L-phenylalanine (4-MeS-AAP-NF, **6a**) in DMSO.

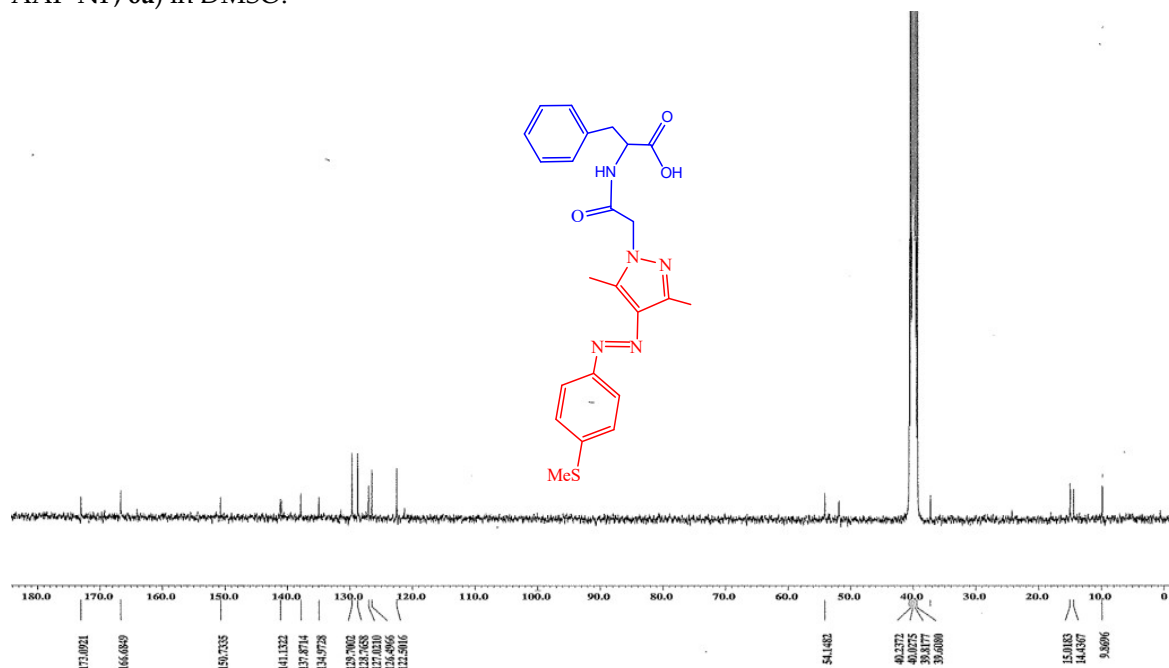

**Figure S10.**  $^{13}\text{C}$ -NMR spectrum 4-(Methylthio)- 3,5-dimethyl-(4-phenyldiazenyl)-N-methylene-L-phenylalanine (4-MeS-AAP-NF, **6a**) in DMSO.

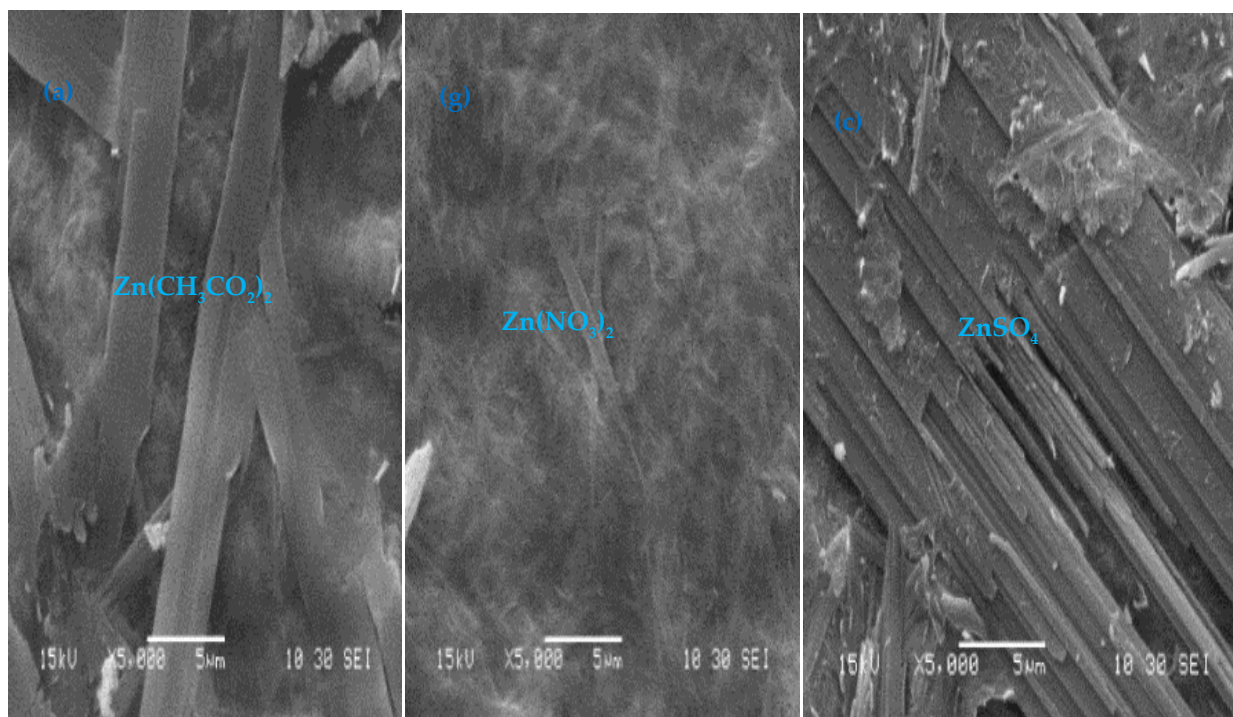

**Figure S11.** Dynamic strain amplitude rheological experiment for different anions of the  $\text{Zn}^{2+}$ -4-MeS-AAP-NF metallo-gels.

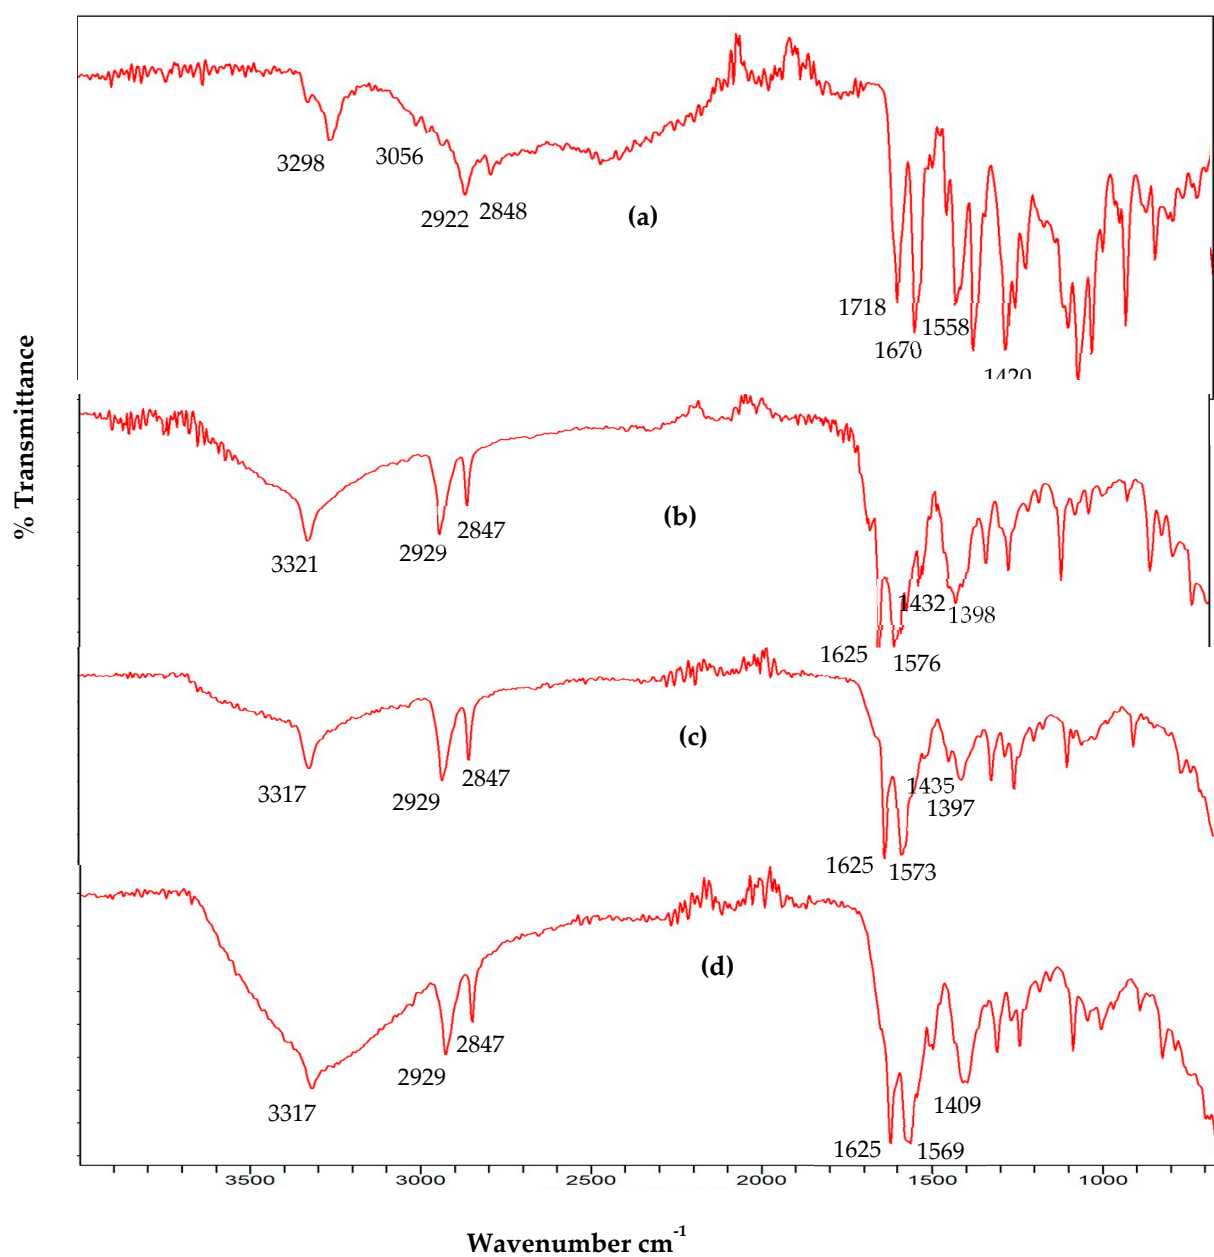

**Figure S12.** FTIR spectra of (a) 4-MeS-AAP-NF; (b) Cu<sup>2+</sup>-4-MeS-AAP-NF; (c) Ni<sup>2+</sup>-4-MeS-AAP-NF and (d) Ni<sup>2+</sup>-4-MeS-AAP-NF xerogels.

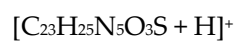

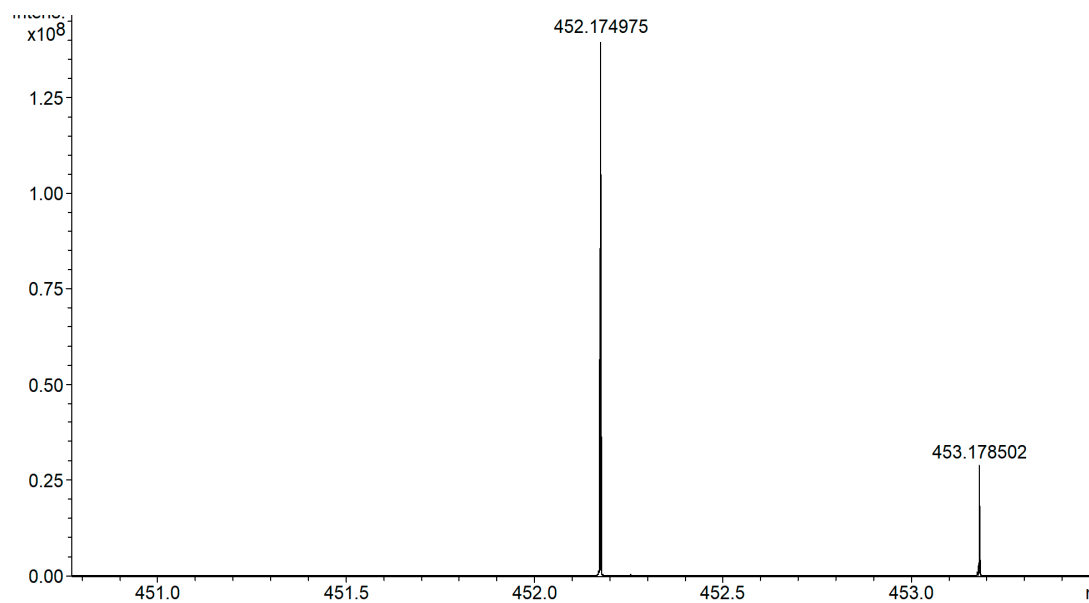

**Figure S13.** Electrospray ionization mass spectrum (ESI-MS) of 4-MeS-AAP-NF (**6a**).

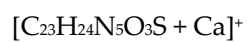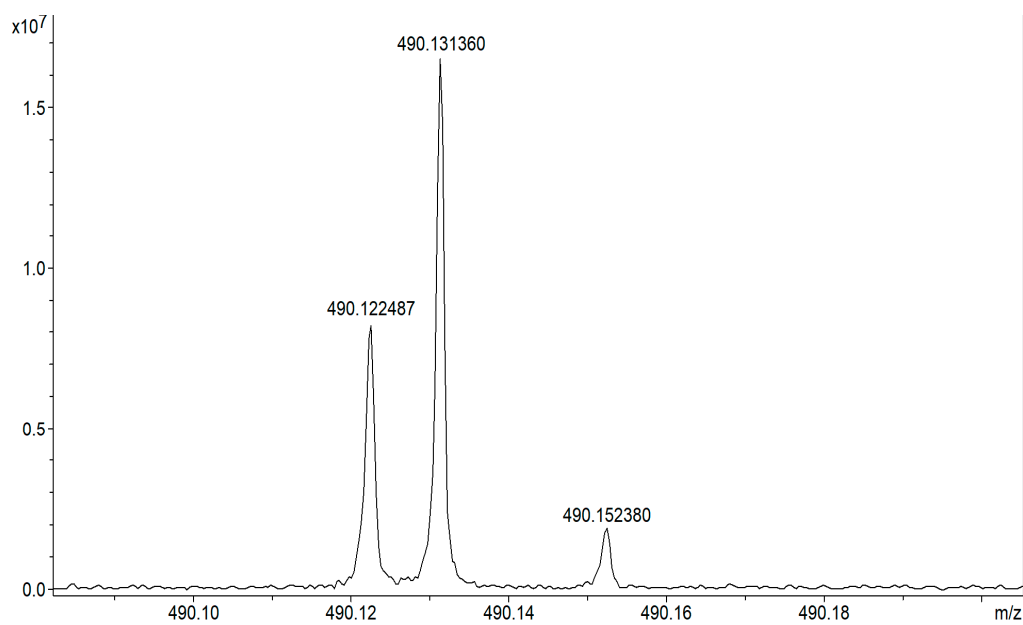

**Figure S14.** Electrospray ionization mass spectrum (ESI-MS) of  $\text{Ca}^{2+}$ -4-MeS-AAP-NF xerogel.



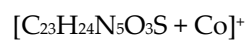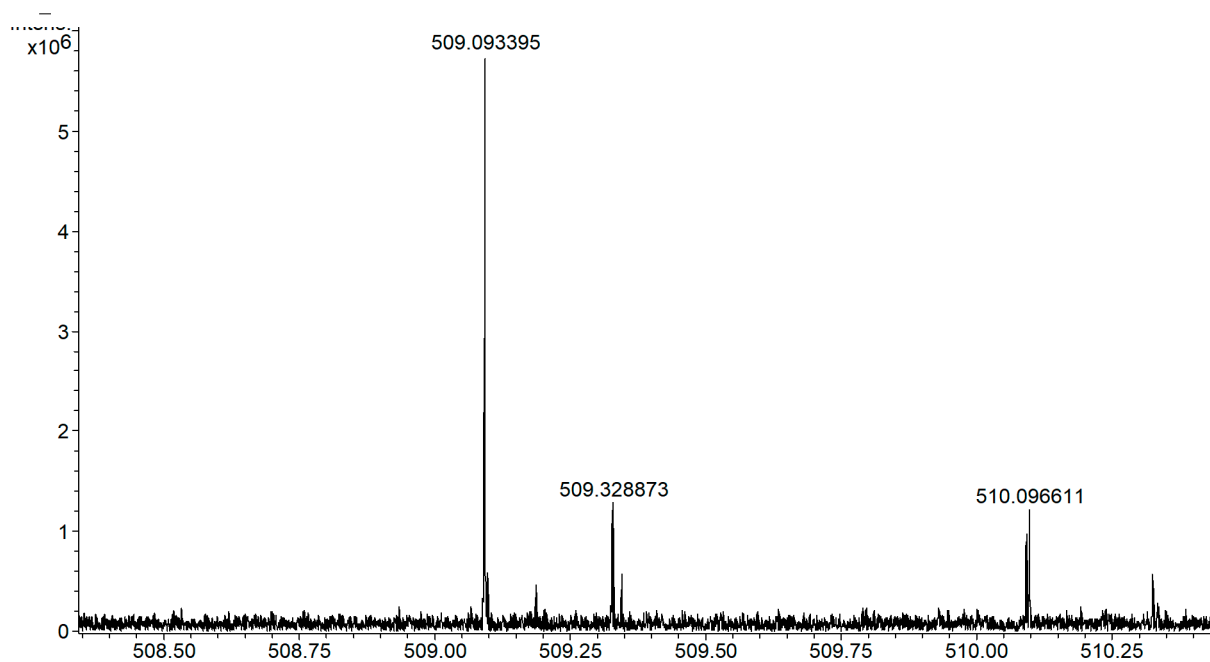

**Figure S15.** Electrospray ionization mass spectrum (ESI-MS) of  $\text{Co}^{2+}$ -4-MeS-AAP-NF xerogel.

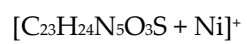

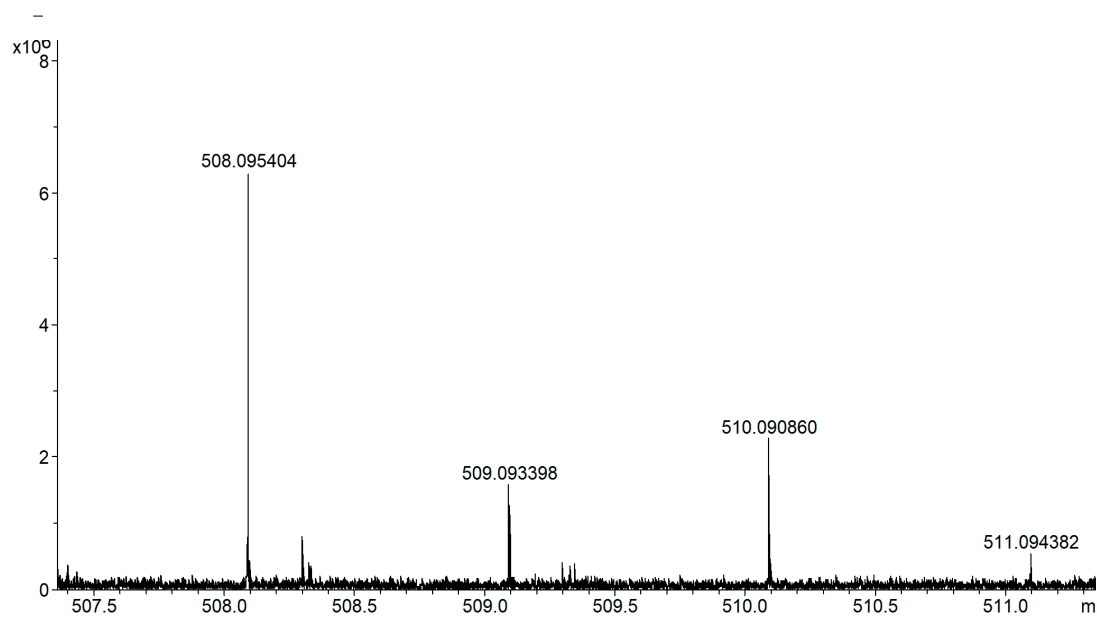

**Figure S16.** Electrospray ionization mass spectrum (ESI-MS) of  $\text{Ni}^{2+}$ -4-MeS-AAP-NF xerogel.

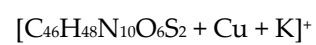

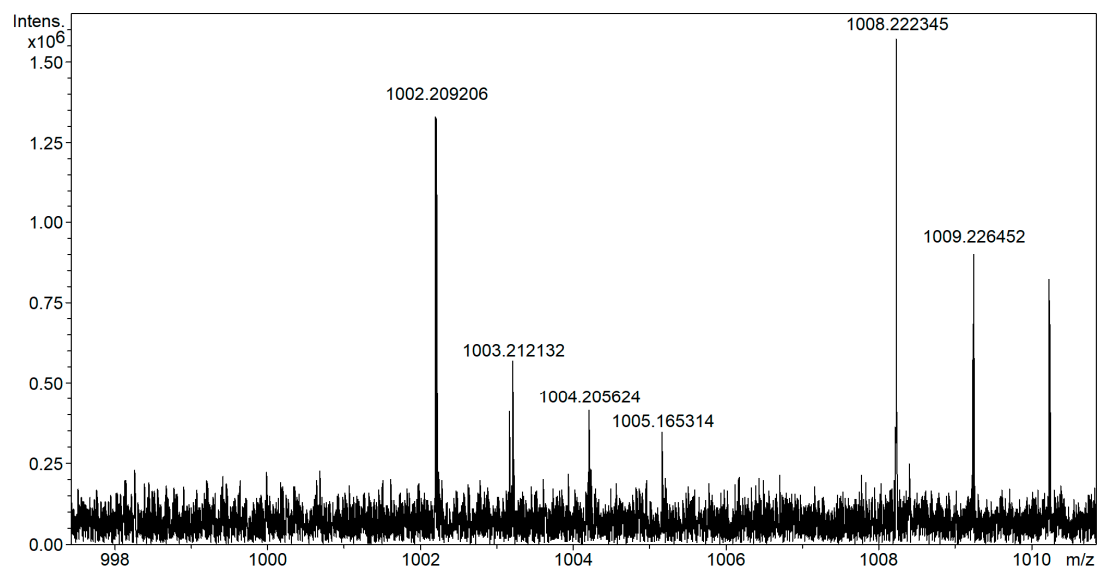

**Figure S17.** Electrospray ionization mass spectrum (ESI-MS) of Cu<sup>2+</sup>-4-MeS-AAP-NF xerogel.
